# Supplementary material for: Identification of lncRNA and mRNA Biomarkers in Osteoarthritic Degenerative Meniscus by Weighted Gene Coexpression Network and Competing Endogenous RNA Network Analysis
Source: Biomed Res Int. 2020 May 20;2020:2123787. doi: 10.1155/2020/2123787 (PMC7341399; doi:10.1155/2020/2123787)
Supplement: Supplementary materials — Table S1: significantly differentially expressed RNAs. Table S2: the results of GO and KEGG analyses of differentially expressed mRNAs. Table S3: lncRNAs and mRNAs in the green module. Table S4: differentially expressed lncRNAs and mRNAs in the green module. Table S5: the PCC of differentially expressed lncRNAs and mRNAs in the green module (the cut-off was PCC > 0.6 or PCC < −0.6). Table S6: the results of GO and KEGG analyses of screened mRNAs. Table S7: the results of lncRNA-miRNA-mRNA network. [file 2123787.f1.zip]

Archive with 7 entries (7 files):
- 2123787.f1.xlsx
- 2123787.f2.xlsx
- 2123787.f3.xlsx
- 2123787.f4.xlsx
- 2123787.f5.xlsx
- 2123787.f6.xlsx
- 2123787.f7.xlsx
