# Supplementary material for: Identification of lncRNA and mRNA Biomarkers in Osteoarthritic Degenerative Meniscus by Weighted Gene Coexpression Network and Competing Endogenous RNA Network Analysis
Source: Biomed Res Int. 2020 May 20;2020:2123787. doi: 10.1155/2020/2123787 (PMC7341399; doi:10.1155/2020/2123787)
Supplement: Supplementary materials — Table S1: significantly differentially expressed RNAs. Table S2: the results of GO and KEGG analyses of differentially expressed mRNAs. Table S3: lncRNAs and mRNAs in the green module. Table S4: differentially expressed lncRNAs and mRNAs in the green module. Table S5: the PCC of differentially expressed lncRNAs and mRNAs in the green module (the cut-off was PCC > 0.6 or PCC < −0.6). Table S6: the results of GO and KEGG analyses of screened mRNAs. Table S7: the results of lncRNA-miRNA-mRNA network. [file 2123787.f1.zip › 2123787.f1.xlsx]

## Sheet: Sheet1
ID	logFC	P.Value	adj.P.Val
CSN1S1|protein_coding	2.88305	4.93096e-10	1.45034e-05
CFD|protein_coding	2.14284	1.3893e-09	2.04318e-05
ADAMTS14|protein_coding	-2.125	7.40555e-09	5.44548e-05
PLEKHG4|protein_coding	-1.20967	2.05032e-08	0.000120612
MFI2-AS1|lncRNA	-1.09986	4.1793e-08	0.000204876
GLIS1|protein_coding	-1.42344	5.23823e-08	0.000220103
TMEM176A|protein_coding	1.44562	6.7775e-08	0.000221496
TSPAN7|protein_coding	1.83867	9.93726e-08	0.000265713
CD34|protein_coding	1.51235	1.10125e-07	0.000269924
KIAA1522|protein_coding	-1.0324	1.75975e-07	0.000398151
ADAM12|protein_coding	-1.27921	3.51873e-07	0.00048914
SLC17A9|protein_coding	-1.52393	3.64426e-07	0.00048914
PLA2G2A|protein_coding	1.90932	3.70172e-07	0.00048914
GZMA|protein_coding	1.54569	3.72996e-07	0.00048914
S1PR1|protein_coding	1.04235	3.90313e-07	0.00048914
S100A8|protein_coding	2.52281	4.68003e-07	0.000522512
CEMIP|protein_coding	-2.26459	5.4788e-07	0.000539033
TNFRSF10D|protein_coding	-1.15356	6.02597e-07	0.000539033
EZH2|protein_coding	-1.68307	6.1577e-07	0.000539033
TNFRSF12A|protein_coding	-1.71037	6.32522e-07	0.000539033
DEFA3|protein_coding	2.03402	6.34314e-07	0.000539033
SPARCL1|protein_coding	2.20834	6.81668e-07	0.000550896
HJURP|protein_coding	-1.11751	7.11728e-07	0.000550896
EFEMP1|protein_coding	1.6935	8.27228e-07	0.000565843
TMEM176B|protein_coding	1.10569	1.02669e-06	0.000656477
PECAM1|protein_coding	1.45833	1.18443e-06	0.000725784
LTF|protein_coding	1.31235	1.36193e-06	0.000771166
CYP1B1|protein_coding	1.16713	1.55821e-06	0.000833304
RGS5|protein_coding	1.12345	1.60076e-06	0.000840772
NT5DC2|protein_coding	-1.25295	1.69176e-06	0.000872977
DEFA4|protein_coding	1.47569	1.79979e-06	0.000912709
C1QB|protein_coding	1.55925	1.86695e-06	0.00093072
MRI1|protein_coding	-1.91273	2.13609e-06	0.00102998
lnc-HLA-DQA1-5	1.00955	2.26799e-06	0.00105887
CACNA1A|protein_coding	-1.12845	2.33311e-06	0.00107225
CRIPAK|protein_coding	-1.34082	2.51288e-06	0.0011371
NARF|protein_coding	-1.41464	2.7274e-06	0.00117972
HOXB2|protein_coding	-1.0954	2.80543e-06	0.00118785
ABCC9|protein_coding	1.39866	2.82697e-06	0.00118785
ST7-OT4|lncRNA	1.23231	3.13415e-06	0.0012226
C1orf54|protein_coding	1.01805	3.2289e-06	0.0012226
SEPP1|protein_coding	1.82329	3.24761e-06	0.0012226
ZNF469|protein_coding	-1.16598	3.59984e-06	0.00129125
NR2F2|protein_coding	1.37641	3.91411e-06	0.00135442
TMEM200A|protein_coding	-1.61995	4.06068e-06	0.00137284
CMIP|protein_coding	-1.25121	4.4773e-06	0.00145192
SLITRK6|protein_coding	1.09841	4.49205e-06	0.00145192
PLXNA1|protein_coding	-1.71618	4.68035e-06	0.00149634
PPP2R3A|protein_coding	-1.45665	4.89227e-06	0.00154693
HEY1|protein_coding	1.19007	5.42421e-06	0.00163702
SERPINF1|protein_coding	1.02995	5.88682e-06	0.00163702
UBE2C|protein_coding	-1.33219	5.92493e-06	0.00163702
lnc-ZSWIM2-4	1.71175	6.53848e-06	0.00171988
SGK2|protein_coding	-2.05073	6.54902e-06	0.00171988
lnc-AP1S2-2	1.17444	6.9127e-06	0.0017378
NPC1|protein_coding	-1.16388	7.31163e-06	0.00179478
MEG9|lncRNA	-1.30008	7.86047e-06	0.00187901
WDR41|protein_coding	-1.06399	7.92159e-06	0.00187901
C16orf54|protein_coding	1.52696	8.11762e-06	0.00188539
RHOT2|protein_coding	-1.08455	8.12532e-06	0.00188539
lnc-ERAL1-1	1.4945	8.51531e-06	0.00192662
GABBR2|protein_coding	1.0665	8.84101e-06	0.00196035
VEGFA|protein_coding	-2.07312	1.0345e-05	0.0022049
ERN2|protein_coding	-1.36556	1.04505e-05	0.00221138
FZD4|protein_coding	1.15041	1.12941e-05	0.0023394
TMEM259|protein_coding	-1.05029	1.25522e-05	0.00252876
NRBP2|protein_coding	-1.28994	1.29312e-05	0.00258738
AHR|protein_coding	1.02005	1.51087e-05	0.00290453
lnc-C9orf107-1	1.08886	1.57416e-05	0.002968
CTHRC1|protein_coding	-1.02374	1.67334e-05	0.00307613
FOSL1|protein_coding	-1.7244	1.70121e-05	0.00308875
F13A1|protein_coding	1.17037	1.789e-05	0.00321757
MRPS27|protein_coding	-1.67018	1.79404e-05	0.00321757
TYMS|protein_coding	-1.67455	1.83377e-05	0.0032689
POSTN|protein_coding	-2.57675	1.93977e-05	0.00343702
lnc-JPH1-5	1.22266	1.98955e-05	0.00348325
COL6A3|protein_coding	-1.74953	2.0811e-05	0.00357961
KDM6B|protein_coding	-1.17878	2.16398e-05	0.00365799
lnc-FANK1-3	-1.47561	2.44946e-05	0.00398043
APOE|protein_coding	1.47534	2.69163e-05	0.00416501
COL5A2|protein_coding	-1.56671	2.70465e-05	0.00416501
CCL3|protein_coding	1.29291	2.7475e-05	0.00417841
LOX|protein_coding	-1.20312	2.78801e-05	0.00419345
NR4A1|protein_coding	1.79998	3.08196e-05	0.00429619
KLF2|protein_coding	1.05172	3.5165e-05	0.00462366
lnc-KCNC2-1	-1.14201	3.60349e-05	0.00466914
KIAA0895L|protein_coding	-1.46397	3.75211e-05	0.00474038
GPR34|protein_coding	1.36198	3.80032e-05	0.00474038
LOXL2|protein_coding	-1.57767	4.45752e-05	0.00534353
PARM1|protein_coding	1.101	4.81453e-05	0.00557519
ZCCHC16|protein_coding	1.43891	5.25463e-05	0.00591281
GIMAP1|protein_coding	1.7573	5.96869e-05	0.00650212
TAF13|protein_coding	-1.27046	6.02812e-05	0.00651857
CFI|protein_coding	1.47318	6.46471e-05	0.00672985
lnc-C2orf40-5	2.19498	6.47518e-05	0.00672985
lnc-PDE6H-2	1.20631	6.8133e-05	0.00688915
IGDCC4|protein_coding	-1.08563	7.49457e-05	0.00720385
lnc-RTN2-1	1.83219	7.55041e-05	0.00722734
ARL4C|protein_coding	-1.42721	8.32108e-05	0.0075408
ULK3|protein_coding	-1.0699	8.79536e-05	0.00776871
SOX11|protein_coding	-1.5609	9.34661e-05	0.00804417
H2AFY2|protein_coding	-1.04076	9.42985e-05	0.00805868
ACSS3|protein_coding	1.30822	0.000103801	0.00843907
CAMK2N1|protein_coding	-1.51736	0.000106245	0.00856158
RAD54L|protein_coding	-1.05258	0.000108313	0.00863362
NXPH1|protein_coding	1.12802	0.000114193	0.00895671
LOXL1|protein_coding	-1.02203	0.000120331	0.00914544
ARID2|protein_coding	-1.319	0.000124998	0.00928566
PPFIBP1|protein_coding	-1.054	0.000142778	0.00995151
LRRC17|protein_coding	-1.24704	0.000152713	0.0102616
ITM2A|protein_coding	1.09657	0.000154205	0.0102616
CA12|protein_coding	-1.61567	0.000159696	0.0105342
NXPH4|protein_coding	-1.32913	0.000160092	0.0105342
KCNK2|protein_coding	1.56993	0.000164837	0.0106557
lnc-ZDHHC17-1	1.00918	0.000169514	0.0107868
lnc-CLEC2D-7	1.15523	0.000173537	0.0109065
LPL|protein_coding	1.06552	0.000185633	0.0114948
S100A9|protein_coding	1.77606	0.000193959	0.0117385
KLF4|protein_coding	1.02157	0.000200865	0.0120327
CCL18|protein_coding	1.20707	0.000216575	0.0126391
SPON2|protein_coding	-1.70272	0.000223432	0.0129205
SYN1|protein_coding	-1.192	0.000230336	0.0130537
C1QA|protein_coding	1.32781	0.00023659	0.0132549
FNBP4|protein_coding	-1.0509	0.00023969	0.0133112
NPHP3|protein_coding	-1.11106	0.000251128	0.0137295
DYNLT1|protein_coding	-1.05813	0.000260107	0.0138999
lnc-SPAG5-1	-1.30971	0.000260125	0.0138999
lnc-CHD9-7	1.00616	0.00026039	0.0138999
UAP1L1|protein_coding	-1.04013	0.000263103	0.0139687
lnc-FAM135B-2	1.34557	0.000267509	0.0141466
NPY1R|protein_coding	1.13703	0.000269118	0.0141466
FUT4|protein_coding	-1.13923	0.000269998	0.0141466
C12orf75|protein_coding	-1.47043	0.000270157	0.0141466
S100A2|protein_coding	-1.01019	0.000282393	0.0145976
ZNF354B|protein_coding	1.00292	0.000291647	0.0148698
C1orf137|lncRNA	1.02387	0.000304593	0.0152364
PNMAL1|protein_coding	-1.16529	0.0003161	0.0155736
AXDND1|protein_coding	-1.83407	0.000318756	0.015652
lnc-PIK3CG-3	1.28803	0.000342732	0.0161035
GJA1|protein_coding	-1.03612	0.000346633	0.016213
lnc-GABRB3-3	-1.75483	0.000346709	0.016213
lnc-RP11-389E17.1.1-3	1.11523	0.000358702	0.0165055
NMNAT2|protein_coding	1.15413	0.000359705	0.0165055
ABHD12|protein_coding	-1.54463	0.000424461	0.0178863
PRG4|protein_coding	1.24907	0.00047576	0.018805
DTYMK|protein_coding	-1.30918	0.000495099	0.0191862
IL11|protein_coding	-2.63197	0.000502718	0.0193124
TRMT6|protein_coding	1.52389	0.000506193	0.0193863
GOLT1B|protein_coding	-1.00815	0.000556539	0.0205389
TATDN2|protein_coding	-1.07081	0.000569417	0.0208091
HMCN1|protein_coding	-1.67753	0.000581867	0.0210251
DNASE1L3|protein_coding	2.35282	0.000586391	0.0211367
PSD3|protein_coding	-1.10101	0.00062783	0.0219444
SRGN|protein_coding	1.02548	0.000634421	0.0219886
ARHGAP1|protein_coding	-1.0275	0.000641046	0.0221304
MDK|protein_coding	-1.10158	0.000654103	0.0224392
lnc-RP11-127H5.1.1-1	1.02948	0.000676776	0.0229282
lnc-SORCS3-5	1.14793	0.000690824	0.0231954
EGR1|protein_coding	1.46663	0.000726423	0.0238729
ACKR1|protein_coding	1.80781	0.000754709	0.0243669
MAFB|protein_coding	-1.02702	0.000778521	0.0247553
CRISPLD2|protein_coding	-1.02562	0.00081726	0.0252436
HLA-DRB5|protein_coding	1.22414	0.000899508	0.0263727
PITPNM3|protein_coding	-1.02067	0.000902782	0.0263927
BCL10|protein_coding	-1.30164	0.000948623	0.0272479
CDNF|protein_coding	1.45551	0.000974343	0.0276892
FAP|protein_coding	-1.24006	0.00100197	0.0282018
PLOD1|protein_coding	-1.01689	0.00103198	0.0286515
CADM4|protein_coding	1.02908	0.00104517	0.028895
CCNB2|protein_coding	-1.38318	0.00107013	0.0293617
SS18L1|protein_coding	-1.10555	0.001219	0.0312578
GRM7|protein_coding	1.21871	0.00122574	0.0312578
IGLL5|protein_coding	1.12383	0.00123755	0.0313161
LBP|protein_coding	1.29172	0.00125946	0.0317021
PLAU|protein_coding	-1.42805	0.00126106	0.0317021
lnc-KCTD10-1	-1.77417	0.00132376	0.0325064
SPTLC2|protein_coding	-1.51841	0.00134979	0.0328436
DCHS1|protein_coding	-1.31628	0.0013762	0.0331825
TAF4B|protein_coding	-1.15012	0.00137798	0.0331825
HLA-DRA|protein_coding	1.21943	0.00146239	0.0341645
PIM1|protein_coding	-1.45527	0.00152976	0.0348597
SOCS5|protein_coding	-1.89205	0.00153007	0.0348597
SLC43A2|protein_coding	1.24406	0.00158549	0.0353288
CPE|protein_coding	1.57948	0.00166499	0.0362759
CD74|protein_coding	1.2721	0.00169458	0.0365136
IRF8|protein_coding	1.08717	0.00172961	0.0367764
A2M|protein_coding	1.14163	0.00185452	0.0381715
UNK|protein_coding	-1.02354	0.00187874	0.038348
lnc-APEX1-1	-1.14246	0.00192597	0.0387881
MXRA5|protein_coding	-1.13091	0.001928	0.0387881
SYVN1|protein_coding	-1.30037	0.00210574	0.0405461
lnc-CALCOCO1-1	1.12015	0.00216664	0.0412984
FIBIN|protein_coding	-1.05458	0.00219098	0.041467
RABIF|protein_coding	1.07193	0.00222022	0.0417991
ROPN1L|protein_coding	1.2896	0.00231185	0.0425452
CEP192|protein_coding	-1.01645	0.00236294	0.0428622
IGFBP4|protein_coding	1.00183	0.00237726	0.0428622
COL3A1|protein_coding	-1.2181	0.00246624	0.0435934
TMEM129|protein_coding	-1.37683	0.00254114	0.0444631
LINC01004|lncRNA	-1.35954	0.00261526	0.045053
ZNF699|protein_coding	-1.46033	0.00268944	0.0457515
CPA3|protein_coding	1.34276	0.00270458	0.0458703
PXDN|protein_coding	-1.06673	0.00270578	0.0458703
GCGR|protein_coding	-1.0015	0.00281178	0.0467972
lnc-KDM6A-1	-1.17067	0.00283232	0.0470395
lnc-LRRC10-1	1.59006	0.003017	0.0485709
ZC3H7B|protein_coding	-1.32272	0.00305232	0.048872
lnc-GATA3-2	-1.45661	0.00307888	0.0490303
