# Supplementary material for: Identification of lncRNA and mRNA Biomarkers in Osteoarthritic Degenerative Meniscus by Weighted Gene Coexpression Network and Competing Endogenous RNA Network Analysis
Source: Biomed Res Int. 2020 May 20;2020:2123787. doi: 10.1155/2020/2123787 (PMC7341399; doi:10.1155/2020/2123787)
Supplement: Supplementary materials — Table S1: significantly differentially expressed RNAs. Table S2: the results of GO and KEGG analyses of differentially expressed mRNAs. Table S3: lncRNAs and mRNAs in the green module. Table S4: differentially expressed lncRNAs and mRNAs in the green module. Table S5: the PCC of differentially expressed lncRNAs and mRNAs in the green module (the cut-off was PCC > 0.6 or PCC < −0.6). Table S6: the results of GO and KEGG analyses of screened mRNAs. Table S7: the results of lncRNA-miRNA-mRNA network. [file 2123787.f1.zip › 2123787.f2.xlsx]

## Sheet: Sheet1
Category	Term	Count	PValue	Genes
BP	GO:0030199~collagen fibril organization	6	2.9e-05	CYP1B1, ADAMTS14, COL3A1, LOX, LOXL2, COL5A2
BP	GO:0030198~extracellular matrix organization	10	9.12e-05	NPHP3, PXDN, CRISPLD2, PECAM1, COL3A1, COL6A3, POSTN, LOX, LOXL1, COL5A2
BP	GO:0050832~defense response to fungus	5	0.000106	S100A8, DEFA4, S100A9, DEFA3, SPON2
BP	GO:0043542~endothelial cell migration	5	0.000142	CYP1B1, FAP, PECAM1, LOXL2, S100A2
BP	GO:0050729~positive regulation of inflammatory response	6	0.000586	LPL, CCL3, S100A8, S100A9, PLA2G2A, CCL18
BP	GO:0051493~regulation of cytoskeleton organization	4	0.000683	S100A8, S100A9, CRIPAK, DYNLT1
BP	GO:0070301~cellular response to hydrogen peroxide	5	0.00193128	CYP1B1, EZH2, KLF2, KLF4, KDM6B
BP	GO:0002576~platelet degranulation	6	0.00273529	A2M, F13A1, PECAM1, VEGFA, CFD, SRGN
BP	GO:0007614~short-term memory	3	0.00295784	SERPINF1, GRM7, MDK
BP	GO:1901215~negative regulation of neuron death	4	0.00604138	SERPINF1, CD34, APOE, TMEM259
BP	GO:0045087~innate immune response	11	0.00695531	C1QA, BCL10, C1QB, S100A8, DEFA4, S100A9, DEFA3, CFI, LBP, SPON2, IGLL5
BP	GO:0010629~negative regulation of gene expression	6	0.0090877	CCL3, SERPINF1, CD34, SOX11, GJA1, KLF4
BP	GO:0048514~blood vessel morphogenesis	3	0.010643	CYP1B1, GJA1, NR2F2
BP	GO:0007155~cell adhesion	11	0.0107211	CYP1B1, S1PR1, CD34, FAP, PECAM1, COL6A3, PPFIBP1, POSTN, ADAM12, SPON2, LOXL2
BP	GO:0019226~transmission of nerve impulse	3	0.014601	S1PR1, GRM7, CACNA1A
BP	GO:0006955~immune response	10	0.0169563	PXDN, CCL3, PRG4, TNFRSF10D, GZMA, IRF8, HLA-DRB5, CD74, CCL18, HLA-DRA
BP	GO:0009612~response to mechanical stimulus	4	0.017495	COL3A1, POSTN, FOSL1, KCNK2
BP	GO:0001525~angiogenesis	7	0.0179839	CYP1B1, S1PR1, HEY1, TNFRSF12A, FAP, PECAM1, VEGFA
BP	GO:0090090~negative regulation of canonical Wnt signaling pathway	6	0.0181323	EGR1, CTHRC1, NPHP3, PPP2R3A, APOE, IGFBP4
BP	GO:0045669~positive regulation of osteoblast differentiation	4	0.018293	CTHRC1, SOX11, LTF, GJA1
BP	GO:0018277~protein deamination	2	0.0184945	LOXL2, LOXL1
BP	GO:0070488~neutrophil aggregation	2	0.0184945	S100A8, S100A9
BP	GO:0045671~negative regulation of osteoclast differentiation	3	0.0207031	CCL3, MAFB, LRRC17
BP	GO:0090102~cochlea development	3	0.0207031	SLITRK6, KCNK2, DCHS1
BP	GO:0030574~collagen catabolic process	4	0.0216848	ADAMTS14, COL3A1, COL6A3, COL5A2
BP	GO:0001666~response to hypoxia	6	0.0222831	EGR1, PLOD1, VEGFA, POSTN, LOXL2, PLAU
BP	GO:0030593~neutrophil chemotaxis	4	0.0235008	CCL3, S100A8, S100A9, CCL18
BP	GO:0006935~chemotaxis	5	0.0270754	CCL3, S1PR1, FOSL1, CCL18, PLAU
BP	GO:0072011~glomerular endothelium development	2	0.0276139	CD34, PECAM1
BP	GO:0071409~cellular response to cycloheximide	2	0.0276139	KLF2, KLF4
BP	GO:0032602~chemokine production	2	0.0276139	S100A8, S100A9
BP	GO:0001937~negative regulation of endothelial cell proliferation	3	0.0295508	APOE, GJA1, NR2F2
BP	GO:0007628~adult walking behavior	3	0.0334409	NPC1, ABHD12, CACNA1A
BP	GO:0030324~lung development	4	0.0337793	NPHP3, CRISPLD2, VEGFA, LOX
BP	GO:0061041~regulation of wound healing	2	0.0366491	TNFRSF12A, PLAU
BP	GO:0006235~dTTP biosynthetic process	2	0.0366491	TYMS, DTYMK
BP	GO:0032119~sequestering of zinc ion	2	0.0366491	S100A8, S100A9
BP	GO:0002793~positive regulation of peptide secretion	2	0.0366491	S100A8, S100A9
BP	GO:0002906~negative regulation of mature B cell apoptotic process	2	0.0366491	BCL10, CD74
BP	GO:0061304~retinal blood vessel morphogenesis	2	0.0366491	CYP1B1, FZD4
BP	GO:0031077~post-embryonic camera-type eye development	2	0.0366491	VEGFA, KLF4
BP	GO:0050728~negative regulation of inflammatory response	4	0.0372489	SERPINF1, APOE, SOCS5, KLF4
BP	GO:0042060~wound healing	4	0.0384445	S100A8, PECAM1, COL3A1, LOX
BP	GO:0001501~skeletal system development	5	0.0389731	SOX11, COL3A1, POSTN, COL5A2, IGFBP4
BP	GO:0006508~proteolysis	10	0.0439731	C1QA, C1QB, ADAMTS14, FAP, LTF, CPA3, CFI, ADAM12, CFD, PLAU
BP	GO:0009636~response to toxic substance	4	0.0447126	TYMS, CCL3, CYP1B1, AHR
BP	GO:0050830~defense response to Gram-positive bacterium	4	0.0447126	DEFA4, PLA2G2A, DEFA3, LBP
BP	GO:0014910~regulation of smooth muscle cell migration	2	0.0456009	PLXNA1, PLAU
BP	GO:2001199~negative regulation of dendritic cell differentiation	2	0.0456009	TMEM176B, TMEM176A
BP	GO:0001822~kidney development	4	0.0460236	NPHP3, SERPINF1, SOX11, VEGFA
BP	GO:0042742~defense response to bacterium	5	0.0463628	S100A8, IRF8, S100A9, DEFA3, IGLL5
BP	GO:0030522~intracellular receptor signaling pathway	3	0.0484817	NR4A1, NR2F2, AHR
CC	GO:0005576~extracellular region	43	2.14e-10	CCL3, A2M, NXPH4, S100A8, ADAMTS14, F13A1, S100A9, COL3A1, MDK, DNASE1L3, IL11, C1ORF54, CRISPLD2, APOE, COL6A3, LTF, CPA3, LBP, CFI, LOX, CFD, FIBIN, LOXL1, SRGN, NXPH1, LPL, GZMA, PRG4, EFEMP1, CSN1S1, COL5A2, C1QA, C1QB, NPC1, SERPINF1, VEGFA, DEFA4, CEMIP, PLA2G2A, DEFA3, ADAM12, PLAU, IGFBP4	CCL3, A2M, NXPH4, S100A8, ADAMTS14, F13A1, S100A9, COL3A1, MDK, DNASE1L3, IL11, C1ORF54, CRISPLD2, APOE, COL6A3, LTF, CPA3, LBP, CFI, LOX, CFD, FIBIN, LOXL1, SRGN, NXPH1, LPL, GZMA, PRG4, EFEMP1, CSN1S1, COL5A2, C1QA, C1QB, NPC1, SERPINF1, VEGFA, DEFA4, CEMIP, PLA2G2A, DEFA3, ADAM12, PLAU, IGFBP4
CC	GO:0005615~extracellular space	38	8.16e-10	CTHRC1, CCL3, PXDN, S100A8, S100A9, COL3A1, POSTN, LRRC17, IL11, APOE, CDNF, FAP, COL6A3, LTF, HLA-DRB5, CPA3, LBP, CFI, LOX, CFD, SPON2, LOXL2, LOXL1, SRGN, LPL, SPARCL1, EFEMP1, CSN1S1, CCL18, SERPINF1, CPE, VEGFA, PECAM1, DEFA4, PLA2G2A, DEFA3, PLAU, IGFBP4	CTHRC1, CCL3, PXDN, S100A8, S100A9, COL3A1, POSTN, LRRC17, IL11, APOE, CDNF, FAP, COL6A3, LTF, HLA-DRB5, CPA3, LBP, CFI, LOX, CFD, SPON2, LOXL2, LOXL1, SRGN, LPL, SPARCL1, EFEMP1, CSN1S1, CCL18, SERPINF1, CPE, VEGFA, PECAM1, DEFA4, PLA2G2A, DEFA3, PLAU, IGFBP4
CC	GO:0031012~extracellular matrix	13	1.67e-05	LPL, PXDN, COL3A1, EFEMP1, S100A9, POSTN, COL5A2, HMCN1, SERPINF1, APOE, COL6A3, LOXL2, LOXL1	LPL, PXDN, COL3A1, EFEMP1, S100A9, POSTN, COL5A2, HMCN1, SERPINF1, APOE, COL6A3, LOXL2, LOXL1
CC	GO:0005578~proteinaceous extracellular matrix	12	3.36e-05	CTHRC1, PXDN, ADAMTS14, CRISPLD2, SPARCL1, VEGFA, COL6A3, EFEMP1, POSTN, LOX, SPON2, COL5A2	CTHRC1, PXDN, ADAMTS14, CRISPLD2, SPARCL1, VEGFA, COL6A3, EFEMP1, POSTN, LOX, SPON2, COL5A2
CC	GO:0005581~collagen trimer	7	0.000189	C1QA, CTHRC1, C1QB, COL3A1, COL6A3, LOX, COL5A2	C1QA, CTHRC1, C1QB, COL3A1, COL6A3, LOX, COL5A2
CC	GO:0031093~platelet alpha granule lumen	5	0.00154282	A2M, F13A1, VEGFA, CFD, SRGN	A2M, F13A1, VEGFA, CFD, SRGN
CC	GO:0009986~cell surface	13	0.00390433	LPL, TNFRSF12A, FZD4, KCNK2, CD74, FAP, VEGFA, LTF, FUT4, LBP, SLITRK6, PLAU, HLA-DRA	LPL, TNFRSF12A, FZD4, KCNK2, CD74, FAP, VEGFA, LTF, FUT4, LBP, SLITRK6, PLAU, HLA-DRA
CC	GO:0030141~secretory granule	5	0.00455854	CPE, VEGFA, PLA2G2A, LTF, CPA3	CPE, VEGFA, PLA2G2A, LTF, CPA3
CC	GO:0030658~transport vesicle membrane	4	0.00487315	CPE, HLA-DRB5, CD74, HLA-DRA	CPE, HLA-DRB5, CD74, HLA-DRA
CC	GO:0030669~clathrin-coated endocytic vesicle membrane	4	0.00603733	HLA-DRB5, FZD4, CD74, HLA-DRA	HLA-DRB5, FZD4, CD74, HLA-DRA
CC	GO:0070062~extracellular exosome	39	0.00633637	PXDN, A2M, CADM4, S100A8, PLXNA1, S100A9, GJA1, CD74, ITM2A, HMCN1, PLOD1, CRISPLD2, APOE, ARHGAP1, COL6A3, LTF, HLA-DRB5, LBP, CFI, CFD, SPON2, IGLL5, LPL, SPARCL1, EFEMP1, FZD4, MXRA5, C1QA, C1QB, NPC1, SERPINF1, CPE, PECAM1, H2AFY2, PLA2G2A, DEFA3, RHOT2, PLAU, HLA-DRA	PXDN, A2M, CADM4, S100A8, PLXNA1, S100A9, GJA1, CD74, ITM2A, HMCN1, PLOD1, CRISPLD2, APOE, ARHGAP1, COL6A3, LTF, HLA-DRB5, LBP, CFI, CFD, SPON2, IGLL5, LPL, SPARCL1, EFEMP1, FZD4, MXRA5, C1QA, C1QB, NPC1, SERPINF1, CPE, PECAM1, H2AFY2, PLA2G2A, DEFA3, RHOT2, PLAU, HLA-DRA
CC	GO:0042613~MHC class II protein complex	3	0.0167139	HLA-DRB5, CD74, HLA-DRA	HLA-DRB5, CD74, HLA-DRA
CC	GO:0005602~complement component C1 complex	2	0.0180265	C1QA, C1QB	C1QA, C1QB
CC	GO:0071556~integral component of lumenal side of endoplasmic reticulum membrane	3	0.0281909	HLA-DRB5, CD74, HLA-DRA	HLA-DRB5, CD74, HLA-DRA
CC	GO:0005604~basement membrane	4	0.0349462	HMCN1, SERPINF1, LOXL2, LOXL1	HMCN1, SERPINF1, LOXL2, LOXL1
CC	GO:0005783~endoplasmic reticulum	14	0.0380707	TMEM129, NPC1, PXDN, SYVN1, PLOD1, CDNF, APOE, GOLT1B, CEMIP, PLA2G2A, CRIPAK, FIBIN, DNASE1L3, KCNK2	TMEM129, NPC1, PXDN, SYVN1, PLOD1, CDNF, APOE, GOLT1B, CEMIP, PLA2G2A, CRIPAK, FIBIN, DNASE1L3, KCNK2
CC	GO:0009897~external side of plasma membrane	6	0.0447479	S1PR1, CD34, PECAM1, HLA-DRB5, IGLL5, CD74	S1PR1, CD34, PECAM1, HLA-DRB5, IGLL5, CD74
CC	GO:0072562~blood microparticle	5	0.0495196	C1QB, A2M, APOE, F13A1, IGLL5	C1QB, A2M, APOE, F13A1, IGLL5
MF	GO:0016641~oxidoreductase activity, acting on the CH-NH2 group of donors, oxygen as acceptor	3	0.000802	LOX, LOXL2, LOXL1
MF	GO:0008201~heparin binding	7	0.00339284	LPL, CRISPLD2, APOE, VEGFA, LTF, POSTN, MDK
MF	GO:0004252~serine-type endopeptidase activity	8	0.00868065	C1QA, C1QB, GZMA, FAP, LTF, CFI, CFD, PLAU
MF	GO:0005509~calcium ion binding	14	0.0135413	PPP2R3A, S100A8, SPARCL1, EFEMP1, S100A9, DNASE1L3, DCHS1, PITPNM3, HMCN1, GRM7, PLA2G2A, RHOT2, CACNA1A, S100A2
MF	GO:0004720~protein-lysine 6-oxidase activity	2	0.0269462	LOX, LOXL2
MF	GO:0035662~Toll-like receptor 4 binding	2	0.035767	S100A8, S100A9
MF	GO:0001540~beta-amyloid binding	3	0.0378896	APOE, CD74, ITM2A
MF	GO:0005102~receptor binding	8	0.042032	LPL, A2M, CADM4, NXPH4, GJA1, LBP, IGFBP4, NXPH1
MF	GO:0004879~RNA polymerase II transcription factor activity, ligand-activated sequence-specific DNA binding	3	0.0420556	NR4A1, NR2F2, AHR
MF	GO:0050544~arachidonic acid binding	2	0.0445084	S100A8, S100A9
KEGG	hsa04610:Complement and coagulation cascades	7	8.2e-05	C1QA, C1QB, A2M, F13A1, CFI, CFD, PLAU
KEGG	hsa05150:Staphylococcus aureus infection	6	0.000247	C1QA, C1QB, HLA-DRB5, CFI, CFD, HLA-DRA
KEGG	hsa05323:Rheumatoid arthritis	5	0.0139259	CCL3, VEGFA, HLA-DRB5, HLA-DRA, IL11
