# Supplementary material for: Identification of lncRNA and mRNA Biomarkers in Osteoarthritic Degenerative Meniscus by Weighted Gene Coexpression Network and Competing Endogenous RNA Network Analysis
Source: Biomed Res Int. 2020 May 20;2020:2123787. doi: 10.1155/2020/2123787 (PMC7341399; doi:10.1155/2020/2123787)
Supplement: Supplementary materials — Table S1: significantly differentially expressed RNAs. Table S2: the results of GO and KEGG analyses of differentially expressed mRNAs. Table S3: lncRNAs and mRNAs in the green module. Table S4: differentially expressed lncRNAs and mRNAs in the green module. Table S5: the PCC of differentially expressed lncRNAs and mRNAs in the green module (the cut-off was PCC > 0.6 or PCC < −0.6). Table S6: the results of GO and KEGG analyses of screened mRNAs. Table S7: the results of lncRNA-miRNA-mRNA network. [file 2123787.f1.zip › 2123787.f3.xlsx]

## Sheet: Sheet1
ID	type	module
A2M	protein_coding	green
ABCC9	protein_coding	green
ACKR1	protein_coding	green
ACSS3	protein_coding	green
ACTA2	protein_coding	green
AGT	protein_coding	green
AHR	protein_coding	green
ALDH2	protein_coding	green
APLN	protein_coding	green
APOE	protein_coding	green
ARHGDIB	protein_coding	green
ARRB1	protein_coding	green
ASAH1	protein_coding	green
ATP8A1	protein_coding	green
C1QA	protein_coding	green
C1QB	protein_coding	green
C1QC	protein_coding	green
C1orf162	protein_coding	green
C1orf54	protein_coding	green
C5AR1	protein_coding	green
C8orf4	protein_coding	green
CA12	protein_coding	green
CADM3	protein_coding	green
CALCRL	protein_coding	green
CAMP	protein_coding	green
CCL14	protein_coding	green
CCL18	protein_coding	green
CCL3	protein_coding	green
CD14	protein_coding	green
CD163	protein_coding	green
CD163L1	protein_coding	green
CD200	protein_coding	green
CD34	protein_coding	green
CD53	protein_coding	green
CD74	protein_coding	green
CFD	protein_coding	green
CFH	protein_coding	green
CFHR3	protein_coding	green
CFI	protein_coding	green
CLIP4	protein_coding	green
COL22A1	protein_coding	green
CRIPAK	protein_coding	green
CSF1R	protein_coding	green
CSN1S1	protein_coding	green
CST5	protein_coding	green
CTSH	protein_coding	green
CX3CR1	protein_coding	green
CXCL12	protein_coding	green
CXCR4	protein_coding	green
CYBB	protein_coding	green
CYGB	protein_coding	green
CYP1B1	protein_coding	green
DEFA3	protein_coding	green
DEFA4	protein_coding	green
DNPH1	protein_coding	green
DUSP1	protein_coding	green
DYNC1I1	protein_coding	green
EFEMP1	protein_coding	green
EMB	protein_coding	green
EMCN	protein_coding	green
EMILIN2	protein_coding	green
EPAS1	protein_coding	green
EPB41L4A	protein_coding	green
EPHX1	protein_coding	green
EVI2B	protein_coding	green
F13A1	protein_coding	green
FAM13C	protein_coding	green
FAM46C	protein_coding	green
FAM84B	protein_coding	green
FBXL19-AS1	lncRNA	green
FCGR3A	protein_coding	green
FGL2	protein_coding	green
FPR3	protein_coding	green
FZD10	protein_coding	green
FZD4	protein_coding	green
GGT5	protein_coding	green
GIMAP1	protein_coding	green
GLUL	protein_coding	green
GPR183	protein_coding	green
GPR34	protein_coding	green
GZMA	protein_coding	green
HBA2	protein_coding	green
HBB	protein_coding	green
HBD	protein_coding	green
HCLS1	protein_coding	green
HEY1	protein_coding	green
HHIP	protein_coding	green
HLA-DMA	protein_coding	green
HLA-DMB	protein_coding	green
HLA-DPA1	protein_coding	green
HLA-DQA1	protein_coding	green
HLA-DQB1	protein_coding	green
HLA-DRA	protein_coding	green
HLA-DRB1	protein_coding	green
HLA-DRB5	protein_coding	green
HMHA1	protein_coding	green
HSD17B11	protein_coding	green
HSPA1A	protein_coding	green
ID4	protein_coding	green
IER2	protein_coding	green
IFI27	protein_coding	green
IFI30	protein_coding	green
IFI44L	protein_coding	green
IGF1	protein_coding	green
IGFBP4	protein_coding	green
IGSF21	protein_coding	green
IGSF6	protein_coding	green
IL31RA	protein_coding	green
ING5	protein_coding	green
IRF8	protein_coding	green
IRX3	protein_coding	green
ITGB2	protein_coding	green
ITM2A	protein_coding	green
KCNK2	protein_coding	green
KCTD12	protein_coding	green
KLF2	protein_coding	green
LCP1	protein_coding	green
LGALS3BP	protein_coding	green
LILRB5	protein_coding	green
LINC00351	lncRNA	green
LINC01272	lncRNA	green
LMO2	protein_coding	green
LPCAT2	protein_coding	green
LPL	protein_coding	green
LTF	protein_coding	green
MARCO	protein_coding	green
MECOM	protein_coding	green
MERTK	protein_coding	green
METTL7A	protein_coding	green
MFAP4	protein_coding	green
MFAP5	protein_coding	green
MGST1	protein_coding	green
MGST2	protein_coding	green
MLIP	protein_coding	green
MNDA	protein_coding	green
MS4A4A	protein_coding	green
MS4A6A	protein_coding	green
MSR1	protein_coding	green
MX1	protein_coding	green
NCF2	protein_coding	green
NDNF	protein_coding	green
NR2F2	protein_coding	green
NR4A1	protein_coding	green
NR4A2	protein_coding	green
PALM	protein_coding	green
PARM1	protein_coding	green
PCDH18	protein_coding	green
PCSK6	protein_coding	green
PDE5A	protein_coding	green
PECAM1	protein_coding	green
PEPD	protein_coding	green
PLA2G2A	protein_coding	green
PLBD1	protein_coding	green
PLEKHA2	protein_coding	green
PODXL	protein_coding	green
PTPN6	protein_coding	green
PZP	protein_coding	green
RFPL1S	lncRNA	green
RGS1	protein_coding	green
RGS16	protein_coding	green
RGS5	protein_coding	green
S100A12	protein_coding	green
S100A8	protein_coding	green
S100A9	protein_coding	green
S1PR1	protein_coding	green
SAT1	protein_coding	green
SBSN	protein_coding	green
SECTM1	protein_coding	green
SEMA5A	protein_coding	green
SEPP1	protein_coding	green
SERPINF1	protein_coding	green
SGK2	protein_coding	green
SIGLEC1	protein_coding	green
SLC15A3	protein_coding	green
SLC43A2	protein_coding	green
SLCO2B1	protein_coding	green
SLITRK6	protein_coding	green
SPARCL1	protein_coding	green
SPI1	protein_coding	green
SPON1	protein_coding	green
SRGN	protein_coding	green
ST3GAL6	protein_coding	green
STAB1	protein_coding	green
STEAP4	protein_coding	green
STOM	protein_coding	green
SUSD1	protein_coding	green
SVEP1	protein_coding	green
TAGLN	protein_coding	green
TEK	protein_coding	green
TFPI	protein_coding	green
TIE1	protein_coding	green
TIMD4	protein_coding	green
TLR2	protein_coding	green
TMEM176A	protein_coding	green
TMEM176B	protein_coding	green
TNFAIP2	protein_coding	green
TPPP	protein_coding	green
TPSAB1	protein_coding	green
TRIM22	protein_coding	green
TSHZ2	protein_coding	green
TSPAN7	protein_coding	green
TYROBP	protein_coding	green
UCHL1	protein_coding	green
VGLL3	protein_coding	green
VSIG4	protein_coding	green
ZFP36	protein_coding	green
lnc-HLA-DQA1-5	lncRNA	green
lnc-LRRC10-1	lncRNA	green
lnc-RP11-127H5.1.1-1	lncRNA	green
lnc-RTN2-1	lncRNA	green
lnc-SAMD3-1	lncRNA	green
lnc-SKA2-1	lncRNA	green
lnc-SLAMF7-2	lncRNA	green
lnc-ZSWIM2-4	lncRNA	green
