# Supplementary material for: Identification of lncRNA and mRNA Biomarkers in Osteoarthritic Degenerative Meniscus by Weighted Gene Coexpression Network and Competing Endogenous RNA Network Analysis
Source: Biomed Res Int. 2020 May 20;2020:2123787. doi: 10.1155/2020/2123787 (PMC7341399; doi:10.1155/2020/2123787)
Supplement: Supplementary materials — Table S1: significantly differentially expressed RNAs. Table S2: the results of GO and KEGG analyses of differentially expressed mRNAs. Table S3: lncRNAs and mRNAs in the green module. Table S4: differentially expressed lncRNAs and mRNAs in the green module. Table S5: the PCC of differentially expressed lncRNAs and mRNAs in the green module (the cut-off was PCC > 0.6 or PCC < −0.6). Table S6: the results of GO and KEGG analyses of screened mRNAs. Table S7: the results of lncRNA-miRNA-mRNA network. [file 2123787.f1.zip › 2123787.f4.xlsx]

## Sheet: Sheet1
ID	type
A2M	protein_coding
ABCC9	protein_coding
ACKR1	protein_coding
ACSS3	protein_coding
AHR	protein_coding
APOE	protein_coding
C1orf54	protein_coding
C1QA	protein_coding
C1QB	protein_coding
CA12	protein_coding
CCL18	protein_coding
CCL3	protein_coding
CD34	protein_coding
CD74	protein_coding
CFD	protein_coding
CFI	protein_coding
CRIPAK	protein_coding
CSN1S1	protein_coding
CYP1B1	protein_coding
DEFA3	protein_coding
DEFA4	protein_coding
EFEMP1	protein_coding
F13A1	protein_coding
FZD4	protein_coding
GIMAP1	protein_coding
GPR34	protein_coding
GZMA	protein_coding
HEY1	protein_coding
HLA-DRA	protein_coding
HLA-DRB5	protein_coding
IGFBP4	protein_coding
IRF8	protein_coding
ITM2A	protein_coding
KCNK2	protein_coding
KLF2	protein_coding
lnc-HLA-DQA1-5	lncRNA
lnc-LRRC10-1	lncRNA
lnc-RP11-127H5.1.1-1	lncRNA
lnc-RTN2-1	lncRNA
lnc-ZSWIM2-4	lncRNA
LPL	protein_coding
LTF	protein_coding
NR2F2	protein_coding
NR4A1	protein_coding
PARM1	protein_coding
PECAM1	protein_coding
PLA2G2A	protein_coding
RGS5	protein_coding
S100A8	protein_coding
S100A9	protein_coding
S1PR1	protein_coding
SEPP1	protein_coding
SERPINF1	protein_coding
SGK2	protein_coding
SLC43A2	protein_coding
SLITRK6	protein_coding
SPARCL1	protein_coding
SRGN	protein_coding
TMEM176A	protein_coding
TMEM176B	protein_coding
TSPAN7	protein_coding
