# Supplementary material for: Identification of lncRNA and mRNA Biomarkers in Osteoarthritic Degenerative Meniscus by Weighted Gene Coexpression Network and Competing Endogenous RNA Network Analysis
Source: Biomed Res Int. 2020 May 20;2020:2123787. doi: 10.1155/2020/2123787 (PMC7341399; doi:10.1155/2020/2123787)
Supplement: Supplementary materials — Table S1: significantly differentially expressed RNAs. Table S2: the results of GO and KEGG analyses of differentially expressed mRNAs. Table S3: lncRNAs and mRNAs in the green module. Table S4: differentially expressed lncRNAs and mRNAs in the green module. Table S5: the PCC of differentially expressed lncRNAs and mRNAs in the green module (the cut-off was PCC > 0.6 or PCC < −0.6). Table S6: the results of GO and KEGG analyses of screened mRNAs. Table S7: the results of lncRNA-miRNA-mRNA network. [file 2123787.f1.zip › 2123787.f5.xlsx]

## Sheet: Sheet1
lncRNA	gene	PCC
lnc-HLA-DQA1-5	ABCC9	0.619807
lnc-HLA-DQA1-5	AHR	0.73529
lnc-HLA-DQA1-5	APOE	0.608113
lnc-HLA-DQA1-5	C1orf54	0.798496
lnc-HLA-DQA1-5	C1QA	0.73318
lnc-HLA-DQA1-5	C1QB	0.837139
lnc-HLA-DQA1-5	CCL18	0.703589
lnc-HLA-DQA1-5	CCL3	0.731983
lnc-HLA-DQA1-5	CD74	0.723712
lnc-HLA-DQA1-5	CFD	0.807615
lnc-HLA-DQA1-5	CFI	0.764531
lnc-HLA-DQA1-5	CRIPAK	-0.60956
lnc-HLA-DQA1-5	CSN1S1	0.676631
lnc-HLA-DQA1-5	CYP1B1	0.811234
lnc-HLA-DQA1-5	DEFA3	0.721639
lnc-HLA-DQA1-5	DEFA4	0.729792
lnc-HLA-DQA1-5	EFEMP1	0.796584
lnc-HLA-DQA1-5	F13A1	0.729018
lnc-HLA-DQA1-5	GPR34	0.695092
lnc-HLA-DQA1-5	GZMA	0.66805
lnc-HLA-DQA1-5	HEY1	0.647195
lnc-HLA-DQA1-5	HLA-DRA	0.775922
lnc-HLA-DQA1-5	HLA-DRB5	0.777909
lnc-HLA-DQA1-5	KCNK2	0.671249
lnc-HLA-DQA1-5	KLF2	0.755882
lnc-HLA-DQA1-5	LTF	0.698698
lnc-HLA-DQA1-5	NR2F2	0.642076
lnc-HLA-DQA1-5	NR4A1	0.666712
lnc-HLA-DQA1-5	PECAM1	0.682395
lnc-HLA-DQA1-5	PLA2G2A	0.673149
lnc-HLA-DQA1-5	S100A8	0.794195
lnc-HLA-DQA1-5	S100A9	0.672555
lnc-HLA-DQA1-5	S1PR1	0.655763
lnc-HLA-DQA1-5	SEPP1	0.711485
lnc-HLA-DQA1-5	SERPINF1	0.693636
lnc-HLA-DQA1-5	SGK2	-0.635474
lnc-HLA-DQA1-5	SPARCL1	0.681397
lnc-HLA-DQA1-5	SRGN	0.66515
lnc-HLA-DQA1-5	TMEM176A	0.743371
lnc-HLA-DQA1-5	TMEM176B	0.770173
lnc-HLA-DQA1-5	TSPAN7	0.670266
lnc-LRRC10-1	A2M	0.672314
lnc-LRRC10-1	ACKR1	0.627709
lnc-LRRC10-1	AHR	0.845716
lnc-LRRC10-1	C1orf54	0.691773
lnc-LRRC10-1	C1QA	0.914865
lnc-LRRC10-1	C1QB	0.801621
lnc-LRRC10-1	CCL3	0.66915
lnc-LRRC10-1	CD74	0.881601
lnc-LRRC10-1	CFD	0.699563
lnc-LRRC10-1	CFI	0.9198
lnc-LRRC10-1	CYP1B1	0.792767
lnc-LRRC10-1	EFEMP1	0.773564
lnc-LRRC10-1	F13A1	0.691052
lnc-LRRC10-1	FZD4	0.660868
lnc-LRRC10-1	GIMAP1	0.720511
lnc-LRRC10-1	HLA-DRA	0.875828
lnc-LRRC10-1	HLA-DRB5	0.659039
lnc-LRRC10-1	IGFBP4	0.719456
lnc-LRRC10-1	IRF8	0.794426
lnc-LRRC10-1	KCNK2	0.787157
lnc-LRRC10-1	KLF2	0.723311
lnc-LRRC10-1	NR2F2	0.758052
lnc-LRRC10-1	PECAM1	0.748533
lnc-LRRC10-1	PLA2G2A	0.666424
lnc-LRRC10-1	S100A8	0.801909
lnc-LRRC10-1	S100A9	0.815148
lnc-LRRC10-1	S1PR1	0.655737
lnc-LRRC10-1	SEPP1	0.780831
lnc-LRRC10-1	SLC43A2	0.710194
lnc-LRRC10-1	SPARCL1	0.734927
lnc-LRRC10-1	SRGN	0.936022
lnc-LRRC10-1	TMEM176A	0.683896
lnc-LRRC10-1	TMEM176B	0.702326
lnc-LRRC10-1	TSPAN7	0.648488
lnc-RP11-127H5.1.1-1	A2M	0.642162
lnc-RP11-127H5.1.1-1	AHR	0.669361
lnc-RP11-127H5.1.1-1	C1orf54	0.602031
lnc-RP11-127H5.1.1-1	C1QA	0.619133
lnc-RP11-127H5.1.1-1	CFI	0.635539
lnc-RP11-127H5.1.1-1	CYP1B1	0.651365
lnc-RP11-127H5.1.1-1	EFEMP1	0.601445
lnc-RP11-127H5.1.1-1	F13A1	0.66976
lnc-RP11-127H5.1.1-1	FZD4	0.704763
lnc-RP11-127H5.1.1-1	GIMAP1	0.695584
lnc-RP11-127H5.1.1-1	GZMA	0.698435
lnc-RP11-127H5.1.1-1	KCNK2	0.627002
lnc-RP11-127H5.1.1-1	LPL	0.694983
lnc-RP11-127H5.1.1-1	S100A8	0.611536
lnc-RP11-127H5.1.1-1	S1PR1	0.632178
lnc-RP11-127H5.1.1-1	SEPP1	0.696724
lnc-RP11-127H5.1.1-1	SERPINF1	0.661282
lnc-RP11-127H5.1.1-1	SLC43A2	0.616486
lnc-RP11-127H5.1.1-1	SRGN	0.614412
lnc-RP11-127H5.1.1-1	TSPAN7	0.609825
lnc-RTN2-1	ABCC9	0.715334
lnc-RTN2-1	ACKR1	0.643607
lnc-RTN2-1	AHR	0.671997
lnc-RTN2-1	C1orf54	0.614956
lnc-RTN2-1	C1QA	0.675848
lnc-RTN2-1	C1QB	0.799501
lnc-RTN2-1	CCL18	0.644584
lnc-RTN2-1	CCL3	0.898229
lnc-RTN2-1	CD34	0.674214
lnc-RTN2-1	CD74	0.644876
lnc-RTN2-1	CFD	0.801863
lnc-RTN2-1	CFI	0.625279
lnc-RTN2-1	CRIPAK	-0.653625
lnc-RTN2-1	CSN1S1	0.748852
lnc-RTN2-1	CYP1B1	0.749167
lnc-RTN2-1	EFEMP1	0.720236
lnc-RTN2-1	F13A1	0.726346
lnc-RTN2-1	HLA-DRA	0.715686
lnc-RTN2-1	IGFBP4	0.768625
lnc-RTN2-1	KLF2	0.731128
lnc-RTN2-1	NR2F2	0.647163
lnc-RTN2-1	NR4A1	0.796756
lnc-RTN2-1	PECAM1	0.674165
lnc-RTN2-1	PLA2G2A	0.647176
lnc-RTN2-1	SEPP1	0.647088
lnc-RTN2-1	SERPINF1	0.606929
lnc-RTN2-1	SPARCL1	0.730042
lnc-RTN2-1	TMEM176A	0.799465
lnc-RTN2-1	TMEM176B	0.809899
lnc-RTN2-1	TSPAN7	0.638044
lnc-ZSWIM2-4	ACSS3	0.608939
lnc-ZSWIM2-4	AHR	0.712814
lnc-ZSWIM2-4	APOE	0.729342
lnc-ZSWIM2-4	C1orf54	0.733421
lnc-ZSWIM2-4	C1QA	0.632212
lnc-ZSWIM2-4	C1QB	0.669601
lnc-ZSWIM2-4	CD34	0.628651
lnc-ZSWIM2-4	CFD	0.700656
lnc-ZSWIM2-4	CYP1B1	0.64162
lnc-ZSWIM2-4	DEFA3	0.699411
lnc-ZSWIM2-4	DEFA4	0.715452
lnc-ZSWIM2-4	F13A1	0.628649
lnc-ZSWIM2-4	GIMAP1	0.664005
lnc-ZSWIM2-4	GPR34	0.71929
lnc-ZSWIM2-4	GZMA	0.684427
lnc-ZSWIM2-4	HEY1	0.7053
lnc-ZSWIM2-4	HLA-DRB5	0.607491
lnc-ZSWIM2-4	KCNK2	0.714302
lnc-ZSWIM2-4	KLF2	0.611697
lnc-ZSWIM2-4	LPL	0.729877
lnc-ZSWIM2-4	LTF	0.713897
lnc-ZSWIM2-4	NR2F2	0.691255
lnc-ZSWIM2-4	PARM1	0.613743
lnc-ZSWIM2-4	PECAM1	0.673808
lnc-ZSWIM2-4	PLA2G2A	0.610071
lnc-ZSWIM2-4	RGS5	0.696879
lnc-ZSWIM2-4	S100A8	0.674499
lnc-ZSWIM2-4	S1PR1	0.698057
lnc-ZSWIM2-4	SEPP1	0.750177
lnc-ZSWIM2-4	SERPINF1	0.698182
lnc-ZSWIM2-4	SGK2	-0.613019
lnc-ZSWIM2-4	SLITRK6	0.646884
lnc-ZSWIM2-4	TMEM176A	0.676082
lnc-ZSWIM2-4	TMEM176B	0.644229
lnc-ZSWIM2-4	TSPAN7	0.751778
