# Supplementary material for: Identification of lncRNA and mRNA Biomarkers in Osteoarthritic Degenerative Meniscus by Weighted Gene Coexpression Network and Competing Endogenous RNA Network Analysis
Source: Biomed Res Int. 2020 May 20;2020:2123787. doi: 10.1155/2020/2123787 (PMC7341399; doi:10.1155/2020/2123787)
Supplement: Supplementary materials — Table S1: significantly differentially expressed RNAs. Table S2: the results of GO and KEGG analyses of differentially expressed mRNAs. Table S3: lncRNAs and mRNAs in the green module. Table S4: differentially expressed lncRNAs and mRNAs in the green module. Table S5: the PCC of differentially expressed lncRNAs and mRNAs in the green module (the cut-off was PCC > 0.6 or PCC < −0.6). Table S6: the results of GO and KEGG analyses of screened mRNAs. Table S7: the results of lncRNA-miRNA-mRNA network. [file 2123787.f1.zip › 2123787.f6.xlsx]

## Sheet: Sheet1
Category	Term	Count	PValue	Genes
BP	GO:0050729~positive regulation of inflammatory response	6	2.45853e-06	LPL, CCL3, S100A8, S100A9, PLA2G2A, CCL18
BP	GO:0050832~defense response to fungus	4	6.90907e-05	S100A8, DEFA4, S100A9, DEFA3
BP	GO:0002576~platelet degranulation	5	0.000247543	A2M, F13A1, PECAM1, CFD, SRGN
BP	GO:0030593~neutrophil chemotaxis	4	0.000996153	CCL3, S100A8, S100A9, CCL18
BP	GO:0051493~regulation of cytoskeleton organization	3	0.00143854	S100A8, S100A9, CRIPAK
BP	GO:0006955~immune response	7	0.00149821	CCL3, GZMA, IRF8, HLA-DRB5, CD74, CCL18, HLA-DRA
BP	GO:0045087~innate immune response	7	0.00166813	C1QA, C1QB, S100A8, DEFA4, S100A9, DEFA3, CFI
BP	GO:0006954~inflammatory response	6	0.00525429	CCL3, S100A8, S100A9, ACKR1, IGFBP4, CCL18
BP	GO:0030522~intracellular receptor signaling pathway	3	0.00570451	NR4A1, NR2F2, AHR
BP	GO:0070488~neutrophil aggregation	2	0.00594653	S100A8, S100A9
BP	GO:1901215~negative regulation of neuron death	3	0.0063054	SERPINF1, CD34, APOE
BP	GO:0007165~signal transduction	10	0.00668365	ABCC9, CD34, SPARCL1, PECAM1, S100A9, NR4A1, NR2F2, IGFBP4, CD74, CCL18
BP	GO:0019731~antibacterial humoral response	3	0.00758963	DEFA4, DEFA3, LTF
BP	GO:0032602~chemokine production	2	0.00890678	S100A8, S100A9
BP	GO:0072011~glomerular endothelium development	2	0.00890678	CD34, PECAM1
BP	GO:0042742~defense response to bacterium	4	0.00919102	S100A8, IRF8, S100A9, DEFA3
BP	GO:0019882~antigen processing and presentation	3	0.0116688	HLA-DRB5, CD74, HLA-DRA
BP	GO:0032119~sequestering of zinc ion	2	0.0118584	S100A8, S100A9
BP	GO:0061304~retinal blood vessel morphogenesis	2	0.0118584	CYP1B1, FZD4
BP	GO:0002793~positive regulation of peptide secretion	2	0.0118584	S100A8, S100A9
BP	GO:2001199~negative regulation of dendritic cell differentiation	2	0.0148014	TMEM176B, TMEM176A
BP	GO:0070374~positive regulation of ERK1 and ERK2 cascade	4	0.0152397	CCL3, PLA2G2A, CD74, CCL18
BP	GO:0007186~G-protein coupled receptor signaling pathway	8	0.0164797	CCL3, GPR34, S1PR1, APOE, ACKR1, FZD4, KCNK2, CCL18
BP	GO:0060333~interferon-gamma-mediated signaling pathway	3	0.0189465	IRF8, HLA-DRB5, HLA-DRA
BP	GO:0070098~chemokine-mediated signaling pathway	3	0.0189465	CCL3, ACKR1, CCL18
BP	GO:0071347~cellular response to interleukin-1	3	0.0189465	CCL3, KLF2, CCL18
BP	GO:0034372~very-low-density lipoprotein particle remodeling	2	0.0206616	LPL, APOE
BP	GO:0009636~response to toxic substance	3	0.0265123	CCL3, CYP1B1, AHR
BP	GO:0050830~defense response to Gram-positive bacterium	3	0.0265123	DEFA4, PLA2G2A, DEFA3
BP	GO:0006956~complement activation	3	0.0276782	C1QA, C1QB, CFD
BP	GO:0001525~angiogenesis	4	0.0286717	CYP1B1, S1PR1, HEY1, PECAM1
BP	GO:0019886~antigen processing and presentation of exogenous peptide antigen via MHC class II	3	0.0306816	HLA-DRB5, CD74, HLA-DRA
BP	GO:0034374~low-density lipoprotein particle remodeling	2	0.0322799	APOE, PLA2G2A
BP	GO:0002523~leukocyte migration involved in inflammatory response	2	0.0322799	S100A8, S100A9
BP	GO:0006958~complement activation, classical pathway	3	0.0350929	C1QA, C1QB, CFI
BP	GO:0030195~negative regulation of blood coagulation	2	0.0351632	CD34, APOE
BP	GO:0007267~cell-cell signaling	4	0.0398248	C1QA, CCL3, S100A9, CCL18
BP	GO:0031640~killing of cells of other organism	2	0.0409048	DEFA4, DEFA3
BP	GO:0071356~cellular response to tumor necrosis factor	3	0.0424864	CCL3, KLF2, CCL18
BP	GO:0030502~negative regulation of bone mineralization	2	0.043763	CCL3, SRGN
BP	GO:0014002~astrocyte development	2	0.0466128	S100A8, S100A9
BP	GO:0010744~positive regulation of macrophage derived foam cell differentiation	2	0.0466128	LPL, PLA2G2A
BP	GO:0002504~antigen processing and presentation of peptide or polysaccharide antigen via MHC class II	2	0.0494543	HLA-DRB5, HLA-DRA
BP	GO:0048514~blood vessel morphogenesis	2	0.0494543	CYP1B1, NR2F2
CC	GO:0005576~extracellular region	22	8.56364e-10	LPL, CCL3, A2M, S100A8, GZMA, F13A1, S100A9, EFEMP1, CSN1S1, C1QA, C1QB, C1ORF54, SERPINF1, APOE, DEFA4, DEFA3, PLA2G2A, LTF, CFI, CFD, IGFBP4, SRGN
CC	GO:0005615~extracellular space	20	2.04441e-09	LPL, CCL3, S100A8, SPARCL1, EFEMP1, S100A9, CSN1S1, CCL18, SERPINF1, APOE, PECAM1, DEFA4, DEFA3, PLA2G2A, LTF, HLA-DRB5, CFI, CFD, IGFBP4, SRGN
CC	GO:0070062~extracellular exosome	20	0.000157568	LPL, A2M, S100A8, SPARCL1, S100A9, EFEMP1, FZD4, CD74, C1QA, C1QB, SERPINF1, APOE, PECAM1, DEFA3, PLA2G2A, LTF, HLA-DRB5, CFI, CFD, HLA-DRA
CC	GO:0030669~clathrin-coated endocytic vesicle membrane	4	0.000216361	HLA-DRB5, FZD4, CD74, HLA-DRA
CC	GO:0031093~platelet alpha granule lumen	4	0.0005177	A2M, F13A1, CFD, SRGN
CC	GO:0042613~MHC class II protein complex	3	0.00177847	HLA-DRB5, CD74, HLA-DRA
CC	GO:0071556~integral component of lumenal side of endoplasmic reticulum membrane	3	0.00308616	HLA-DRB5, CD74, HLA-DRA
CC	GO:0009897~external side of plasma membrane	5	0.00316763	S1PR1, CD34, PECAM1, HLA-DRB5, CD74
CC	GO:0009986~cell surface	7	0.00429645	LPL, LTF, SLITRK6, FZD4, KCNK2, CD74, HLA-DRA
CC	GO:0030658~transport vesicle membrane	3	0.00525695	HLA-DRB5, CD74, HLA-DRA
CC	GO:0005602~complement component C1 complex	2	0.00569877	C1QA, C1QB
CC	GO:0072562~blood microparticle	4	0.00932652	C1QB, A2M, APOE, F13A1
CC	GO:0012507~ER to Golgi transport vesicle membrane	3	0.00966673	HLA-DRB5, CD74, HLA-DRA
CC	GO:0031012~extracellular matrix	5	0.0100171	LPL, SERPINF1, APOE, EFEMP1, S100A9
CC	GO:0030666~endocytic vesicle membrane	3	0.0152458	HLA-DRB5, CD74, HLA-DRA
CC	GO:0032588~trans-Golgi network membrane	3	0.0234561	HLA-DRB5, CD74, HLA-DRA
CC	GO:0000139~Golgi membrane	6	0.0261997	PARM1, HLA-DRB5, CD74, SRGN, HLA-DRA, GIMAP1
CC	GO:0005886~plasma membrane	19	0.0325805	LPL, PARM1, S100A8, S100A9, ACKR1, CRIPAK, FZD4, KCNK2, CD74, ABCC9, S1PR1, APOE, CD34, PECAM1, RGS5, PLA2G2A, HLA-DRB5, SLC43A2, HLA-DRA
CC	GO:0042627~chylomicron	2	0.0392285	LPL, APOE
MF	GO:0004252~serine-type endopeptidase activity	6	0.000507641	C1QA, C1QB, GZMA, LTF, CFI, CFD
MF	GO:0004879~RNA polymerase II transcription factor activity, ligand-activated sequence-specific DNA binding	3	0.00395405	NR4A1, NR2F2, AHR
MF	GO:0035662~Toll-like receptor 4 binding	2	0.0103862	S100A8, S100A9
MF	GO:0050544~arachidonic acid binding	2	0.0129662	S100A8, S100A9
MF	GO:0050786~RAGE receptor binding	2	0.0283088	S100A8, S100A9
MF	GO:0023026~MHC class II protein complex binding	2	0.0409161	CD74, HLA-DRA
MF	GO:0019955~cytokine binding	2	0.0484036	FZD4, CD74
KEGG	hsa05150:Staphylococcus aureus infection	6	2.11447e-06	C1QA, C1QB, HLA-DRB5, CFI, CFD, HLA-DRA
KEGG	hsa04610:Complement and coagulation cascades	6	7.2052e-06	C1QA, C1QB, A2M, F13A1, CFI, CFD
KEGG	hsa05322:Systemic lupus erythematosus	4	0.0165916	C1QA, C1QB, HLA-DRB5, HLA-DRA
KEGG	hsa04514:Cell adhesion molecules (CAMs)	4	0.0193467	CD34, PECAM1, HLA-DRB5, HLA-DRA
KEGG	hsa05133:Pertussis	3	0.0369322	C1QA, C1QB, IRF8
KEGG	hsa04612:Antigen processing and presentation	3	0.0378363	HLA-DRB5, CD74, HLA-DRA
KEGG	hsa04640:Hematopoietic cell lineage	3	0.0483286	CD34, HLA-DRB5, HLA-DRA
KEGG	hsa05323:Rheumatoid arthritis	3	0.0493302	CCL3, HLA-DRB5, HLA-DRA
