# Supplementary material for: Identification of lncRNA and mRNA Biomarkers in Osteoarthritic Degenerative Meniscus by Weighted Gene Coexpression Network and Competing Endogenous RNA Network Analysis
Source: Biomed Res Int. 2020 May 20;2020:2123787. doi: 10.1155/2020/2123787 (PMC7341399; doi:10.1155/2020/2123787)
Supplement: Supplementary materials — Table S1: significantly differentially expressed RNAs. Table S2: the results of GO and KEGG analyses of differentially expressed mRNAs. Table S3: lncRNAs and mRNAs in the green module. Table S4: differentially expressed lncRNAs and mRNAs in the green module. Table S5: the PCC of differentially expressed lncRNAs and mRNAs in the green module (the cut-off was PCC > 0.6 or PCC < −0.6). Table S6: the results of GO and KEGG analyses of screened mRNAs. Table S7: the results of lncRNA-miRNA-mRNA network. [file 2123787.f1.zip › 2123787.f7.xlsx]

## Sheet: Sheet1
Node1	Node2	Line
lnc-HLA-DQA1-5	hsa-miR-6799-5p	lncRNA
lnc-RP11-127H5.1.1-1	hsa-miR-6764-5p	lncRNA
lnc-RP11-127H5.1.1-1	hsa-miR-1915-3p	lncRNA
lnc-RTN2-1	hsa-miR-6796-5p	lncRNA
lnc-RTN2-1	hsa-miR-6895-3p	lncRNA
hsa-miR-6799-5p	IGFBP4	mRNA
hsa-miR-1915-3p	IGFBP4	mRNA
hsa-miR-6764-5p	IGFBP4	mRNA
hsa-miR-6796-5p	IGFBP4	mRNA
hsa-miR-6895-3p	KLF2	mRNA
